# Supplementary material for: Sources and characteristics of size-resolved particulate organic acids and methanesulfonate in a coastal megacity: Manila, Philippines
Source: Copernicus journal article supplement (doi:10.5194/acp-2020-661), 2020-07-27
Supplement: Supplementary file 1 [file acp-2020-661-supplement.pdf]

**Table S1:** Summary of selected prior work characterizing size-resolved organic acids and methanesulfonate (MSA).

| <b>Location</b>                                                                                        | <b>Selected Species</b>                              | <b>Reference</b>                                                          |
|--------------------------------------------------------------------------------------------------------|------------------------------------------------------|---------------------------------------------------------------------------|
| <i>Arctic</i>                                                                                          |                                                      |                                                                           |
| Arctic                                                                                                 | MSA, oxalate, succinate                              | Kerminen et al. (1999)                                                    |
| <i>Asia</i>                                                                                            |                                                      |                                                                           |
| Chengdu, China                                                                                         | Oxalate, succinate, adipate, maleate, phthalate      | Cheng et al. (2015)<br>Huang et al. (2019)                                |
| Shanghai, China                                                                                        | MSA, oxalate                                         | Ding et al. (2017)                                                        |
| North, west, and south of Japan                                                                        | Oxalate, succinate                                   | Gao et al. (2003)                                                         |
| Gwangju, Korea                                                                                         | Oxalate                                              | Park and Kim (2014)                                                       |
| Baoji, China<br>Mt. Tai, China<br>Okinawa Island, Japan                                                | Succinate, phthalate                                 | Wang et al. (2017)                                                        |
| Xi'an, China                                                                                           | Oxalate, succinate, adipate, maleate, phthalate      | Wang et al. (2012)                                                        |
| Hong Kong                                                                                              | Oxalate, succinate                                   | Yao et al. (2002)                                                         |
| <i>Europe</i>                                                                                          |                                                      |                                                                           |
| Finokalia, Greece                                                                                      | MSA, oxalate, succinate                              | Bardouki et al. (2003)                                                    |
| Sagres, Portugal<br>Melpitz, Germany                                                                   | MSA, oxalate, succinate, adipate                     | Neusüss et al. (2000)                                                     |
| Melpitz, Germany<br>Falkenberg, Germany<br>Goldlauter, Germany<br>Leipzig, Germany<br>Dresden, Germany | Oxalate, succinate                                   | van Pinxteren et al. (2014)                                               |
| Po Valley, Italy                                                                                       | Oxalate                                              | Sandrini et al. (2016)                                                    |
| <i>North America</i>                                                                                   |                                                      |                                                                           |
| Central California                                                                                     | MSA, succinate, maleate, oxalate                     | Maudlin et al. (2015)                                                     |
| California                                                                                             | Oxalate                                              | Murphy et al. (2009)                                                      |
| Hayden and Winkelman,<br>Arizona                                                                       | Oxalate                                              | Sorooshian et al. (2012)                                                  |
| Thompson Farm and Shoals,<br>New England                                                               | Oxalate, succinate, maleate, MSA                     | Ziemba et al. (2011)                                                      |
| <i>South America</i>                                                                                   |                                                      |                                                                           |
| Rondônia, Brazil                                                                                       | MSA, oxalate, succinate, maleate, adipate, phthalate | Blazso et al. (2003)<br>Decesari et al. (2006)<br>Falkovich et al. (2005) |
| <i>Other</i>                                                                                           |                                                      |                                                                           |
| North Pacific<br>East Asia                                                                             | Oxalate, succinate                                   | Mochida et al. (2003)                                                     |
| Tudor Hill, Bermuda                                                                                    | Oxalate                                              | Turekian et al. (2003)                                                    |

**Table S2:** MOUDI sample set details including sample start date and time, sampling flow rate, sample duration, and average values of both the temperature of the MOUDI housing and relative humidity (RH) of ambient air. Sets marked with “\*” are sets with gravimetric data.

| Sample ID | Start Date (Local) | Flow (L min <sup>-1</sup> ) | Run Time (h) | Temp. (°C) | RH (%) | Sample ID | Start Date (Local) | Flow (L min <sup>-1</sup> ) | Run Time (h) | Temp. (°C) | RH (%) |
|-----------|--------------------|-----------------------------|--------------|------------|--------|-----------|--------------------|-----------------------------|--------------|------------|--------|
| MO1       | 07/19/18 12:40     | 29.6                        | 24           | 30.5       | 59.0   | MO31*     | 02/13/19 15:33     | 29.9                        | 49           | 35.8       | 65.7   |
| MO2       | 07/23/18 11:29     | 29.6                        | 54           | 31.7       | 66.8   | MO33      | 02/23/19 5:00      | 29.8                        | 48           | 34.3       | 58.1   |
| MO4*      | 07/25/18 19:16     | 30.3                        | 119          | 34.4       | 69.0   | MO34      | 03/04/19 14:05     | 29.4                        | 48           | 35.3       | 57.9   |
| MO5       | 07/30/18 19:17     | 28.8                        | 42           | 33.5       | 66.7   | MO36*     | 03/12/19 15:50     | 29.3                        | 48           | 39.9       | 56.8   |
| MO6       | 08/06/18 14:33     | 27.1                        | 48           | 34.6       | 63.3   | MO37      | 03/20/19 15:15     | 30.0                        | 48           | 38.8       | 55.1   |
| MO7       | 08/14/18 13:59     | 27.9                        | 48           | 34.9       | 78.3   | MO38      | 03/30/19 5:00      | 29.6                        | 48           | 36.4       | 54.0   |
| MO8       | 08/22/18 13:46     | 29.0                        | 48           | 35.7       | 78.2   | MO40*     | 04/08/19 14:30     | 29.6                        | 48           | 41.4       | 57.6   |
| MO9       | 09/01/18 5:00      | 27.5                        | 48           | 34.9       | 68.4   | MO41      | 04/16/19 14:30     | 29.1                        | 48           | 38.7       | 57.7   |
| MO10      | 09/10/18 14:42     | 29.0                        | 48           | 36.7       | 65.2   | MO42      | 04/24/19 14:30     | 29.1                        | 48           | 40.3       | 53.7   |
| MO11      | 09/18/18 14:12     | 27.1                        | 48           | 35.8       | 68.3   | MO44*     | 05/04/19 5:00      | 28.6                        | 48           | 37.0       | 59.8   |
| MO12      | 09/26/18 13:53     | 27.5                        | 48           | 37.0       | 70.9   | MO45      | 05/13/19 14:30     | 28.7                        | 48           | 37.3       | 61.8   |
| MO14*     | 10/06/18 5:00      | 26.1                        | 48           | 32.0       | 73.1   | MO46      | 05/21/19 14:30     | 28.7                        | 48           | 39.0       | 72.2   |
| MO15      | 10/15/18 14:37     | 29.7                        | 48           | 37.3       | 67.6   | MO47      | 05/29/19 14:24     | 28.9                        | 48           | 39.3       | 64.5   |
| MO16      | 10/23/18 14:18     | 29.2                        | 48           | 37.6       | 67.7   | MO48*     | 06/08/19 5:00      | 28.0                        | 48           | 38.9       | 62.6   |
| MO17      | 11/06/18 15:42     | 30.0                        | 48           | 36.5       | 60.6   | MO50      | 06/17/19 14:20     | 28.8                        | 48           | 39.2       | 64.4   |
| MO18      | 11/10/18 5:00      | 29.5                        | 48           | 36.7       | 61.9   | MO51      | 06/25/19 14:18     | 27.8                        | 50           | 36.2       | 77.1   |
| MO19      | 11/19/18 13:55     | 31.4                        | 48           | 35.8       | 61.4   | MO53*     | 07/03/19 14:43     | 26.9                        | 48           | 38.8       | 60.9   |
| MO20      | 11/27/18 14:16     | 30.2                        | 48           | 34.8       | 60.8   | MO54      | 07/13/19 5:00      | 28.8                        | 48           | 36.8       | 66.4   |
| MO21      | 12/05/18 13:57     | 30.5                        | 48           | 34.8       | 72.0   | MO55      | 07/22/19 14:40     | 28.8                        | 48           | 38.0       | 75.4   |
| MO22      | 12/15/18 5:00      | 29.6                        | 48           | 32.7       | 78.5   | MO56      | 07/30/19 14:37     | 26.7                        | 48           | 35.0       | 76.1   |
| MO23      | 12/24/18 13:30     | 26.4                        | 48           | 29.7       | 81.8   | MO57*     | 08/07/19 14:18     | 27.5                        | 48           | 33.0       | 94.1   |
| MO24      | 12/31/18 14:45     | 30.2                        | 48           | 35.8       | 84.6   | MO59      | 08/17/19 5:00      | 28.2                        | 48           | 37.8       | 85.9   |
| MO26      | 01/01/19 13:30     | 24.1                        | 48           | 35.0       | 77.2   | MO60      | 08/26/19 14:31     | 28.2                        | 48           | 37.3       | 92.7   |
| MO27      | 01/09/19 14:48     | 23.9                        | 48           | 36.2       | 65.3   | MO61      | 09/03/19 14:28     | 29.4                        | 48           | 36.3       | 62.1   |
| MO28      | 01/19/19 5:00      | 25.0                        | 48           | 33.1       | 63.5   | MO62*     | 09/11/19 14:34     | 27.8                        | 48           | 36.5       | 77.0   |
| MO29      | 01/28/19 14:17     | 29.5                        | 48           | 34.5       | 63.3   | MO64      | 09/21/19 5:00      | 27.0                        | 48           | 37.5       | 67.2   |
| MO30      | 02/05/19 13:30     | 29.8                        | 48           | 34.4       | 60.7   | MO65*     | 09/30/19 14:30     | 27.2                        | 48           | 38.4       | 65.3   |

**Table S3:** Water-soluble species analyzed with their respective recovery  $\pm$  standard deviation (SD) and limit of detection (LOD) in aqueous concentration units quantified using ICP-QQQ (elements: Al to V) and IC (ions: adipate to sulfate). LOD units for elements and ions are ppt and ppb, respectively.

| <b>Species</b> | <b>Recovery<br/><math>\pm</math> SD (%)</b> | <b>LOD</b> |
|----------------|---------------------------------------------|------------|
| Al             | 96 $\pm$ 7                                  | 29.474     |
| As             | 98 $\pm$ 10                                 | 7.945      |
| Cd             | 102 $\pm$ 11                                | 4.194      |
| K              | 93 $\pm$ 18                                 | 10.48      |
| Ni             | 97 $\pm$ 8                                  | 2.837      |
| Pb             | 99 $\pm$ 8                                  | 0.503      |
| Ti             | 101 $\pm$ 10                                | 39.046     |
| V              | 95 $\pm$ 9                                  | 1.353      |
| Adipate        | 101 $\pm$ 4                                 | 22.655     |
| Chloride       | 103 $\pm$ 7                                 | 2.144      |
| Maleate        | 100 $\pm$ 3                                 | 6.97       |
| MSA            | 102 $\pm$ 6                                 | 12.316     |
| Nitrate        | 106 $\pm$ 12                                | 8.917      |
| Oxalate        | 100 $\pm$ 2                                 | 12.312     |
| Phthalate      | 99 $\pm$ 2                                  | 20.685     |
| Sodium         | 104 $\pm$ 8                                 | 43.476     |
| Succinate      | 98 $\pm$ 9                                  | 11.046     |
| Sulfate        | 101 $\pm$ 3                                 | 11.982     |

**Table S4:** Summary of positive matrix factorization (PMF) and error estimation diagnostics.

|                                                  |         |
|--------------------------------------------------|---------|
| <b>Factors</b>                                   | 5       |
| <b>Q<sub>Robust</sub></b>                        | 3075    |
| <b>Q<sub>True</sub></b>                          | 4369    |
| <b>Q<sub>Rob/Exp</sub></b>                       | 0.41    |
| <b>Q/Q<sub>Exp</sub> &gt; 6</b>                  | -       |
| <b>DISP %dQ</b>                                  | -0.0004 |
| <b>DISP swaps</b>                                | 0       |
| <b>Factors with<br/>BS mapping &lt;<br/>100%</b> | 1       |
| <b>BS-DISP %<br/>cases with<br/>swaps</b>        | 0       |

**Table S5:** Percentage that each organic acid and MSA contributes to the total mass for all (0.056 – 18  $\mu\text{m}$ ), submicrometer, and supermicrometer size ranges, as well as for each individual stage. These percentages were calculated as the mean based on the 11 simultaneously collected MOUDI sets for gravimetric and chemical analysis. “Unresolved” represents the percent difference between the total mass and the following measured constituents: black carbon (BC), and water-soluble ions ( $\text{Na}^+$ ,  $\text{NH}_4^+$ ,  $\text{Mg}^{2+}$ ,  $\text{Ca}^{2+}$ , dimethylamine (DMA), trimethylamine (TMA), and diethylamine (DEA), methanesulfonate (MSA), pyruvate, adipate, succinate, maleate, oxalate, phthalate,  $\text{Cl}^-$ ,  $\text{NO}_3^-$ , and  $\text{SO}_4^{2-}$ ) and elements (Ag, Al, As, Ba, Cd, Co, Cr, Cs, Cu, Fe, Hf, K, Mn, Mo, Nb, Ni, Pb, Rb, Se, Sn, Sr, Ti, Tl, V, Y, Zn, and Zr). Error associated with BC is reported as the standard deviation in measured BC as a function of size. Cells marked with “-“ denote values of zero.

| <b>Stages</b>                          | <b>Total</b> | <b>Phthalate</b> | <b>Adipate</b> | <b>Succinate</b> | <b>Maleate</b> | <b>Oxalate</b> | <b>MSA</b> | <b>Unresolved</b> | <b>BC Error</b> |
|----------------------------------------|--------------|------------------|----------------|------------------|----------------|----------------|------------|-------------------|-----------------|
| <b>All</b>                             | 0.80%        | 0.03%            | 0.03%          | 0.03%            | 0.04%          | 0.64%          | 0.02%      | 33.74%            | 21.72%          |
| <b>&lt; 1 <math>\mu\text{m}</math></b> | 0.78%        | 0.03%            | 0.01%          | 0.04%            | 0.06%          | 0.60%          | 0.03%      | 17.78%            | 34.27%          |
| <b>&gt; 1 <math>\mu\text{m}</math></b> | 0.84%        | 0.04%            | 0.06%          | 0.02%            | -              | 0.71%          | 0.01%      | 69.10%            | 3.59%           |
| <b>10 – 18</b>                         | 0.63%        | -                | 0.04%          | 0.04%            | -              | 0.56%          | -          | 79.43%            | 26.47%          |
| <b>5.6 – 10</b>                        | 0.70%        | -                | 0.21%          | 0.02%            | -              | 0.45%          | 0.02%      | 76.76%            | 1.04%           |
| <b>3.2 – 5.6</b>                       | 0.56%        | 0.03%            | 0.06%          | 0.02%            | -              | 0.44%          | -          | 73.36%            | 2.95%           |
| <b>1.8 – 3.2</b>                       | 0.98%        | 0.07%            | 0.04%          | 0.03%            | -              | 0.84%          | -          | 67.60%            | 3.48%           |
| <b>1.0 – 1.8</b>                       | 1.01%        | 0.03%            | 0.03%          | 0.01%            | 0.01%          | 0.93%          | 0.01%      | 63.21%            | 8.68%           |
| <b>0.56 – 1.0</b>                      | 1.06%        | 0.03%            | 0.01%          | 0.05%            | 0.13%          | 0.80%          | 0.04%      | 36.58%            | 15.25%          |
| <b>0.32 – 0.56</b>                     | 0.88%        | 0.04%            | 0.01%          | 0.07%            | 0.06%          | 0.65%          | 0.04%      | 16.04%            | 29.51%          |
| <b>0.18 – 0.32</b>                     | 0.55%        | 0.03%            | 0.01%          | 0.01%            | 0.01%          | 0.46%          | 0.03%      | 2.99%             | 43.55%          |
| <b>0.10 – 0.18</b>                     | 0.56%        | -                | 0.04%          | 0.05%            | -              | 0.45%          | 0.02%      | 7.97%             | 85.41%          |
| <b>0.056 – 0.10</b>                    | 0.49%        | -                | -              | 0.03%            | -              | 0.46%          | -          | 63.88%            | 49.91%          |

1 **Table S6:** Pearson's correlation matrix (r values) of water-soluble species across all MOUDI  
 2 sizes (0.056 – 18  $\mu\text{m}$ ). Blank boxes indicate p-values exceeding 0.05 and thus deemed to be  
 3 statistically insignificant. Similar correlation matrices can be seen for submicrometer and  
 4 supermicrometer sizes in Table 3. Ad – adipate, Su – succinate, Ma – maleate, Ox – oxalate, Ph  
 5 – phthalate.

|            |           |           |          |           |          |           |           |           |           |           |           |            |            |            |           |           |           |           |           |  |
|------------|-----------|-----------|----------|-----------|----------|-----------|-----------|-----------|-----------|-----------|-----------|------------|------------|------------|-----------|-----------|-----------|-----------|-----------|--|
| <b>Al</b>  | 1.00      |           |          |           |          |           |           |           |           |           |           |            |            |            |           |           |           |           |           |  |
| <b>Ti</b>  | 0.49      | 1.00      |          |           |          |           |           |           |           |           |           |            |            |            |           |           |           |           |           |  |
| <b>K</b>   | 0.57      |           | 1.00     |           |          |           |           |           |           |           |           |            |            |            |           |           |           |           |           |  |
| <b>Rb</b>  | 0.63      |           | 0.48     | 1.00      |          |           |           |           |           |           |           |            |            |            |           |           |           |           |           |  |
| <b>V</b>   |           |           |          | 0.36      | 1.00     |           |           |           |           |           |           |            |            |            |           |           |           |           |           |  |
| <b>Ni</b>  | 0.35      | 0.34      |          | 0.41      | 0.79     | 1.00      |           |           |           |           |           |            |            |            |           |           |           |           |           |  |
| <b>As</b>  |           | 0.41      |          |           |          |           | 1.00      |           |           |           |           |            |            |            |           |           |           |           |           |  |
| <b>Cd</b>  |           | 0.28      |          |           | 0.67     | 0.69      |           | 1.00      |           |           |           |            |            |            |           |           |           |           |           |  |
| <b>Pb</b>  | 0.44      | 0.33      | 0.30     | 0.29      | 0.32     | 0.42      |           | 0.44      | 1.00      |           |           |            |            |            |           |           |           |           |           |  |
| <b>Na</b>  | 0.36      | 0.38      |          |           |          |           |           |           |           | 1.00      |           |            |            |            |           |           |           |           |           |  |
| <b>Cl</b>  | 0.54      | 0.36      | 0.41     |           |          |           |           |           |           | 0.78      | 1.00      |            |            |            |           |           |           |           |           |  |
| <b>NO3</b> | 0.49      |           | 0.44     | 0.31      |          |           |           |           |           | 0.56      | 0.49      | 1.00       |            |            |           |           |           |           |           |  |
| <b>SO4</b> |           |           | 0.32     | 0.46      | 0.44     |           |           |           |           |           |           | 0.50       | 1.00       |            |           |           |           |           |           |  |
| <b>MSA</b> |           |           |          | 0.37      |          |           |           |           |           | 0.42      |           | 0.35       | 0.59       | 1.00       |           |           |           |           |           |  |
| <b>Ad</b>  |           |           |          |           |          |           |           |           |           |           |           |            |            |            | 1.00      |           |           |           |           |  |
| <b>Su</b>  | 0.36      |           |          | 0.67      |          |           |           |           |           | 0.38      |           |            | 0.43       | 0.67       |           | 1.00      |           |           |           |  |
| <b>Ma</b>  |           |           |          |           |          |           |           |           |           |           |           |            |            |            | 0.45      |           | 1.00      |           |           |  |
| <b>Ox</b>  | 0.42      |           |          | 0.71      | 0.44     | 0.45      |           |           |           |           |           | 0.31       | 0.69       | 0.53       |           | 0.76      |           | 1.00      |           |  |
| <b>Ph</b>  | 0.41      | 0.36      |          | 0.48      |          |           |           |           |           | 0.53      | 0.35      | 0.31       | 0.34       | 0.58       | 0.43      | 0.73      |           | 0.63      | 1.00      |  |
|            | <b>Al</b> | <b>Ti</b> | <b>K</b> | <b>Rb</b> | <b>V</b> | <b>Ni</b> | <b>As</b> | <b>Cd</b> | <b>Pb</b> | <b>Na</b> | <b>Cl</b> | <b>NO3</b> | <b>SO4</b> | <b>MSA</b> | <b>Ad</b> | <b>Su</b> | <b>Ma</b> | <b>Ox</b> | <b>Ph</b> |  |

6

**Table S7:** Size distribution peaks for each season and respective concentrations. “All” represents the cumulative dataset.

| Species          | Peak Bins ( $\mu\text{m}$ ) |           |           |           |           | Peak Values ( $\text{ng m}^{-3}$ ) |       |       |       |       |
|------------------|-----------------------------|-----------|-----------|-----------|-----------|------------------------------------|-------|-------|-------|-------|
|                  | All                         | SWM18     | Trans     | NEM       | SWM19     | All                                | SWM18 | Trans | NEM   | SWM19 |
| <b>Phthalate</b> | 0.32-0.56                   | 0.32-0.56 | 0.32-0.56 | 0.18-0.32 | 0.56-1.0  | 2.1                                | 5.7   | 9.2   | 0.68  | 1.4   |
|                  | 1.8-3.2                     | 3.2-5.6   | 3.2-5.6   | 3.2-5.6   | 1.8-3.2   | 1.2                                | 0.81  | 2.9   | 1.5   | 1.8   |
| <b>Adipate</b>   | 0.10-0.18                   | 0.32-0.56 | 0.32-0.56 | 0.10-0.18 | 0.10-0.18 | 1.1                                | 1.7   | 2.2   | 0.86  | 1.6   |
|                  | 0.32-0.56                   |           | 1.0-1.8   | 1.8-3.2   | 0.56-1.0  | 1.0                                |       | 1.4   | 0.37  | 1.4   |
|                  | 5.6-10.0                    | 5.6-10.0  | 5.6-10.0  | 5.6-10.0  | 3.2-5.6   | 0.95                               | 0.93  | 0.86  | 0.75  | 2.3   |
| <b>Succinate</b> | 0.32-0.56                   | 0.32-0.56 | 0.18-0.32 | 0.10-0.18 | 0.56-1.0  | 3.1                                | 7.8   | 1.5   | 0.52  | 2.5   |
|                  |                             |           | 0.56-1.0  | 0.32-0.56 |           |                                    |       | 4.0   | 2.0   |       |
|                  | 1.8-3.2                     | 1.8-3.2   | 3.2-5.6   | 1.8-3.2   | 1.8-3.2   | 0.69                               | 1.1   | 0.26  | 0.73  | 0.41  |
| <b>Maleate</b>   | 0.56-1.0                    | 0.56-1.0  | 0.56-1.0  | 0.32-0.56 | 0.56-1.0  | 5.1                                | 9.9   | 1.7   | 0.94  | 11    |
|                  |                             |           |           |           |           |                                    |       |       |       |       |
| <b>Oxalate</b>   | 0.32-0.56                   | 0.32-0.56 | 0.32-0.56 | 0.32-0.56 | 0.56-1.0  | 32                                 | 35    | 58    | 31    | 28    |
|                  | 1.8-3.2                     | 1.8-3.2   | 1.8-3.2   | 1.8-3.2   | 1.8-3.2   | 20                                 | 26    | 30    | 18    | 18    |
| <b>MSA</b>       | 0.32-0.56                   | 0.32-0.56 | 0.32-0.56 | 0.32-0.56 | 0.32-0.56 | 2.0                                | 3.5   | 2.2   | 1.2   | 2.3   |
|                  | 5.6-10.0                    |           | 1.8-3.2   | 5.6-10.0  | 5.6-10.0  | 0.043                              |       | 0.15  | 0.034 | 0.11  |

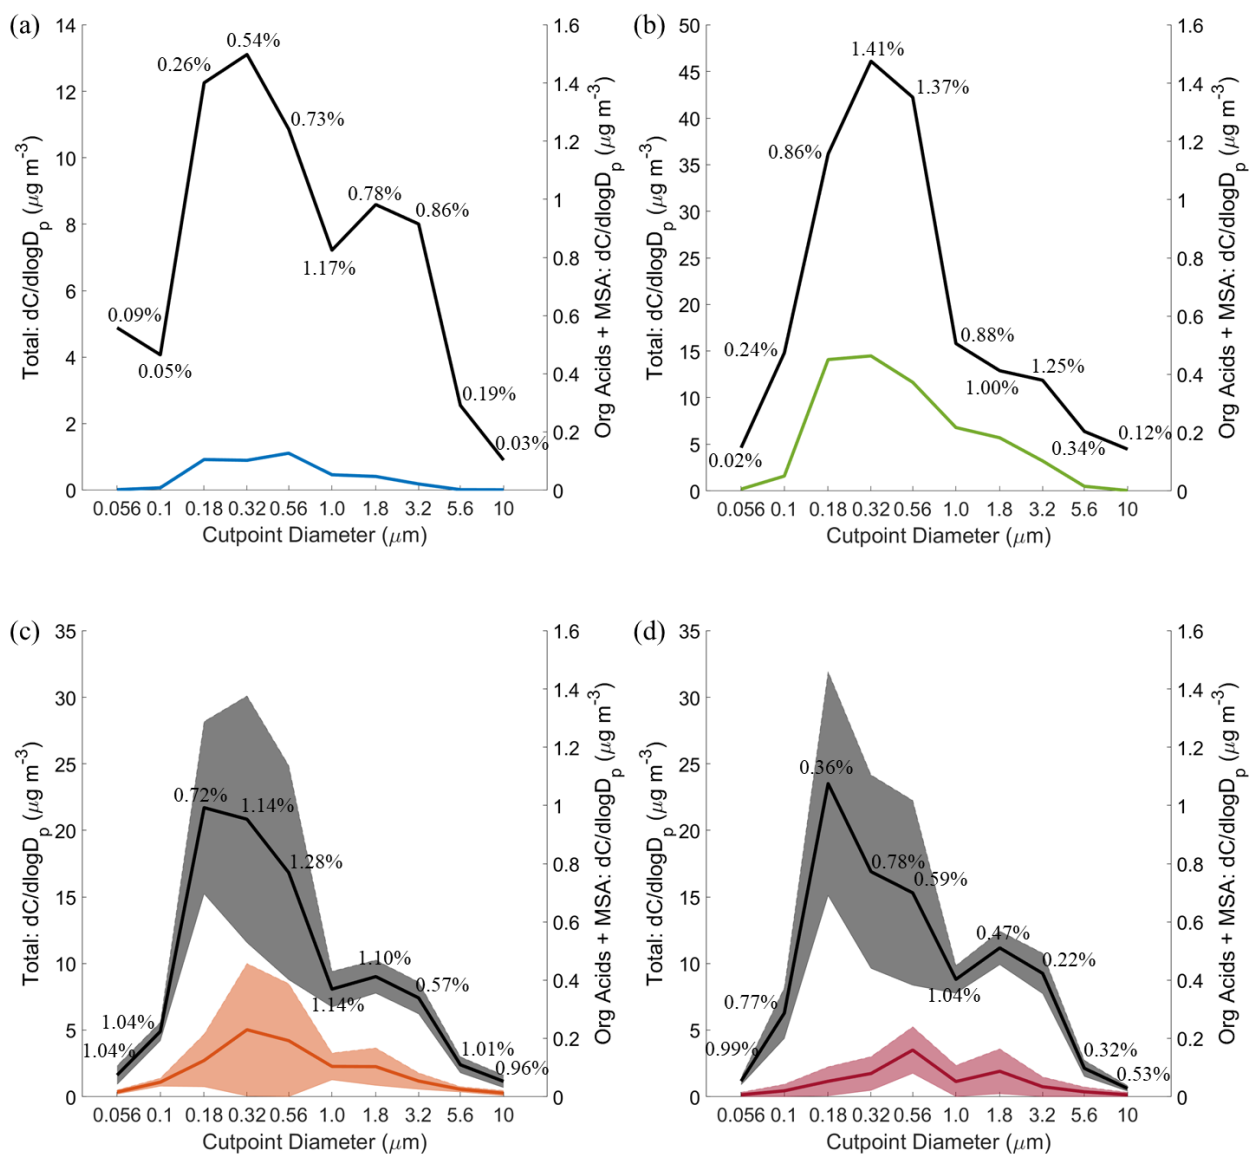

**Figure S1:** Size-resolved comparison of (black curve) total mass and (colored curve) the sum of measured organic acids and MSA for the (a) 2018 southwest monsoon (SWM18), (b) transitional period (Trans), (c) northeast monsoon (NEM), and (d) 2019 southwest monsoon (SWM19) seasons. Solid lines are the averages and shaded areas represent one standard deviation. The average percent contribution of the organic acids and MSA to total mass is provided for each size bin. These plots are based on data from the 11 MOUDI chemical sets with accompanying gravimetric measurements. It should be noted that SWM18 and Trans each only one gravimetric set and thus standard deviations are unavailable.



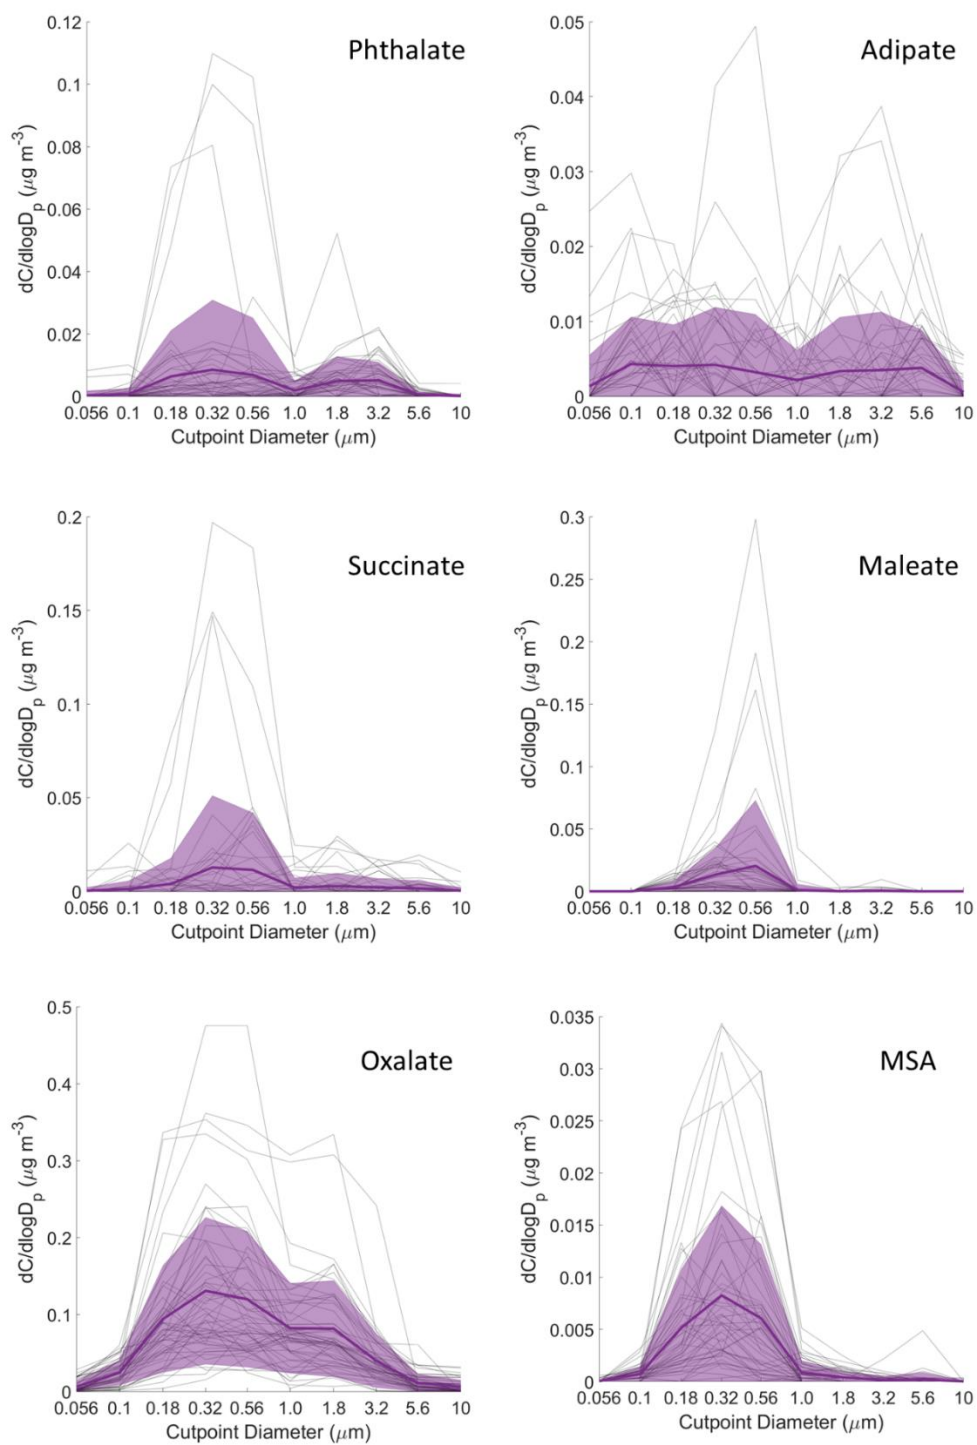

**Figure S2:** Cumulative size distributions for each organic acid and MSA. The transparent lines are the individual sets, while the thick colored lines and transparent shaded areas represent the mean and standard deviation, respectively, of the cumulative sets.

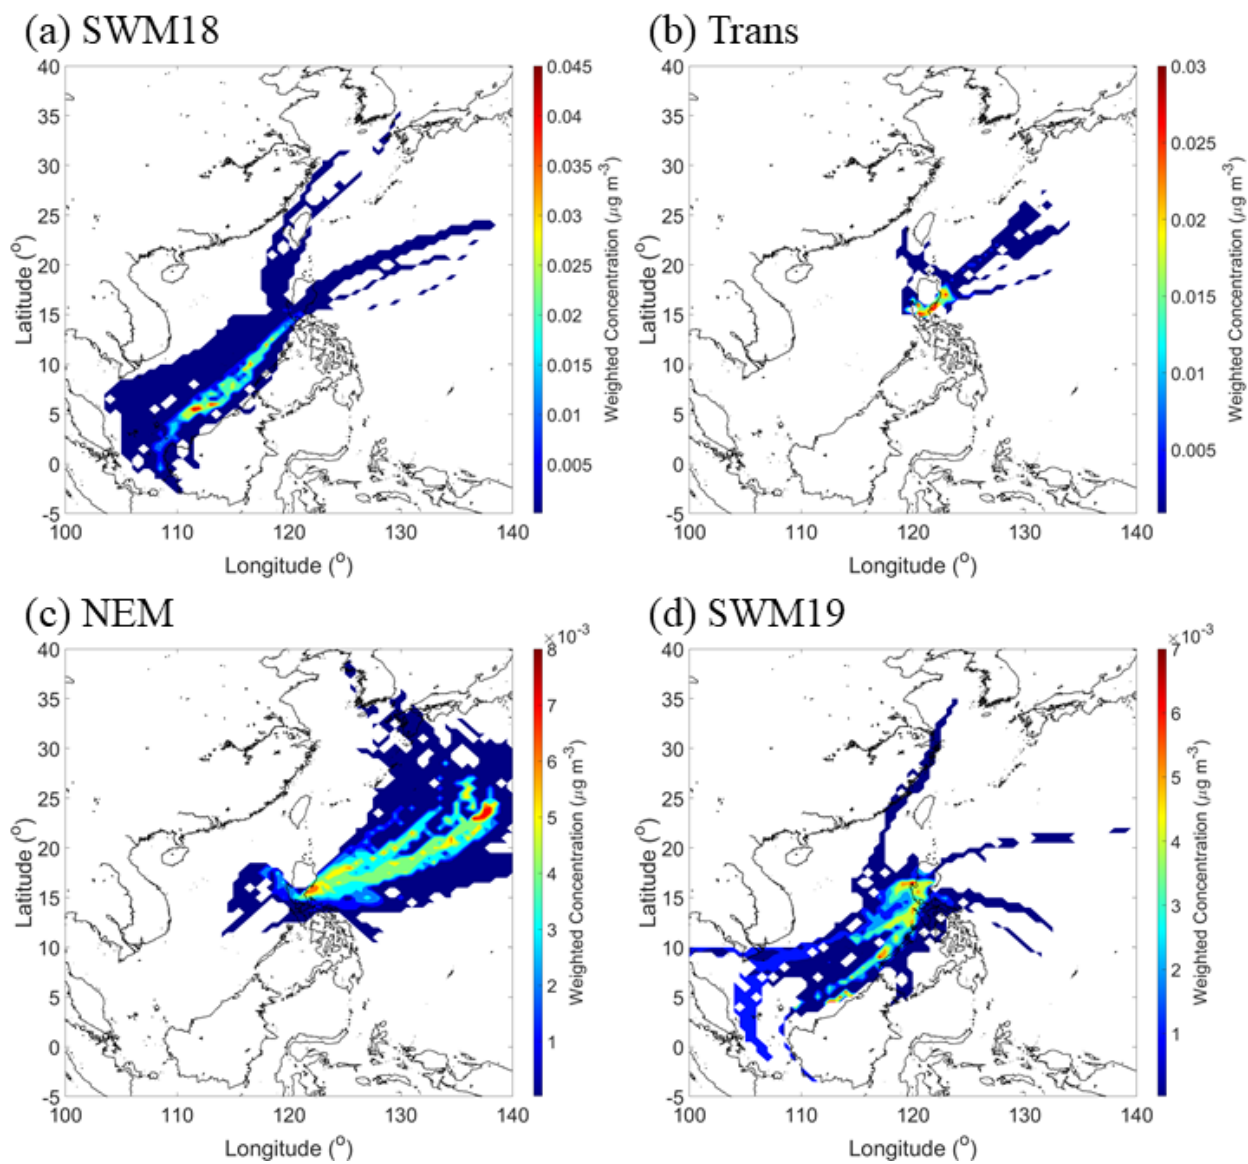

**Figure S3:** WCWT maps of phthalate for (a) 2018 southwest monsoon (SWM18), (b) transitional period (Trans), (c) northeast monsoon (NEM), and (d) 2019 southwest monsoon (SWM19) for all sizes.

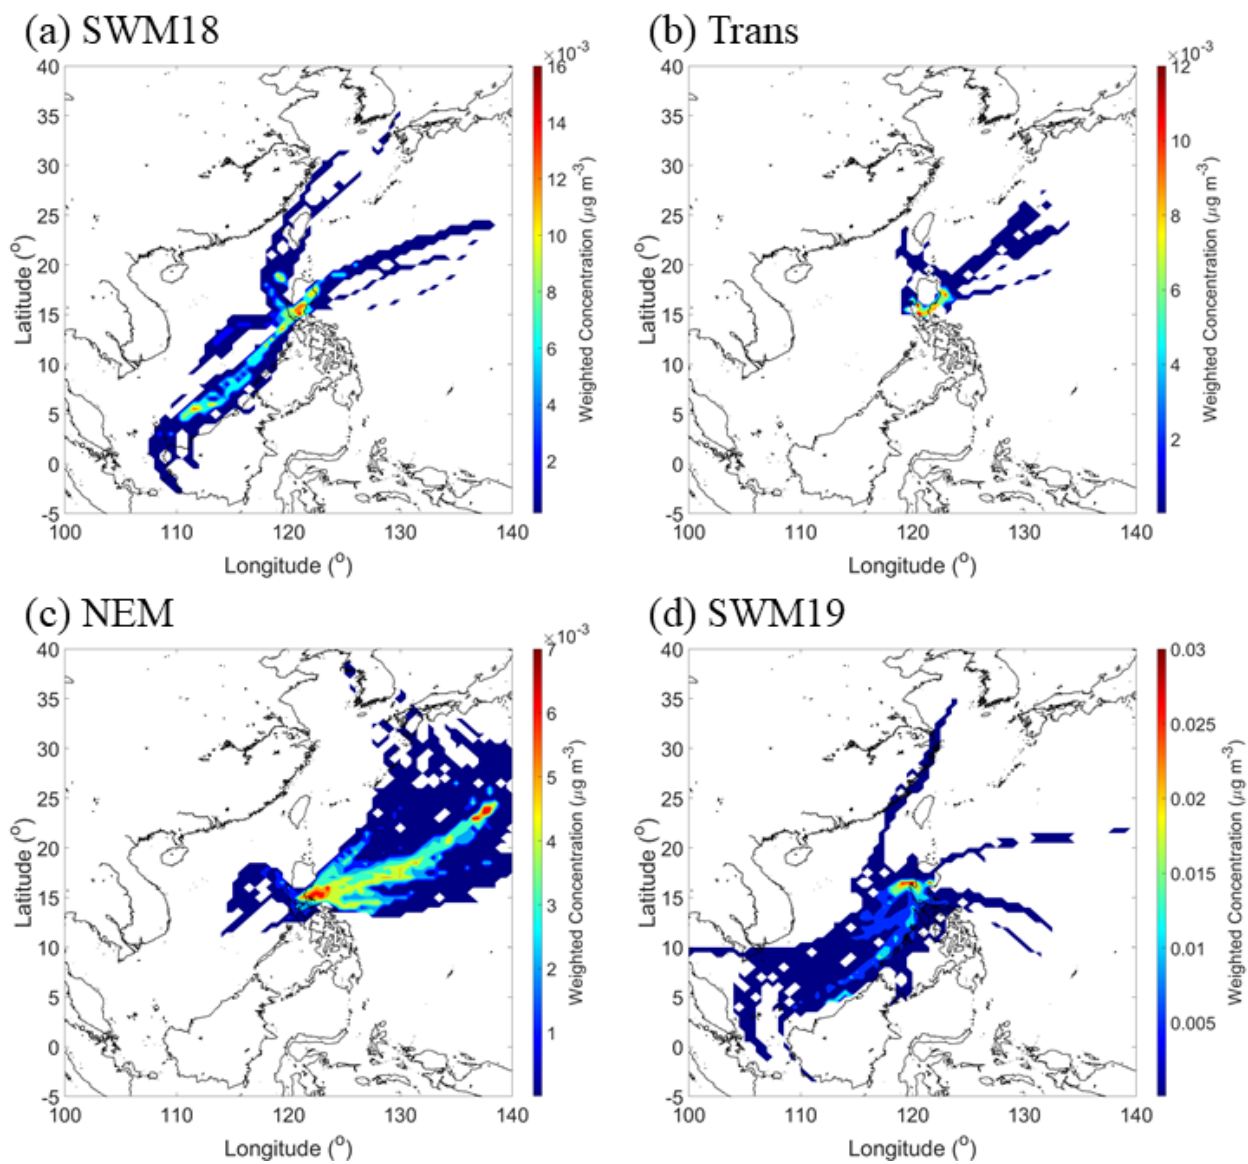

**Figure S4:** Same as Figure S3 except for adipate.

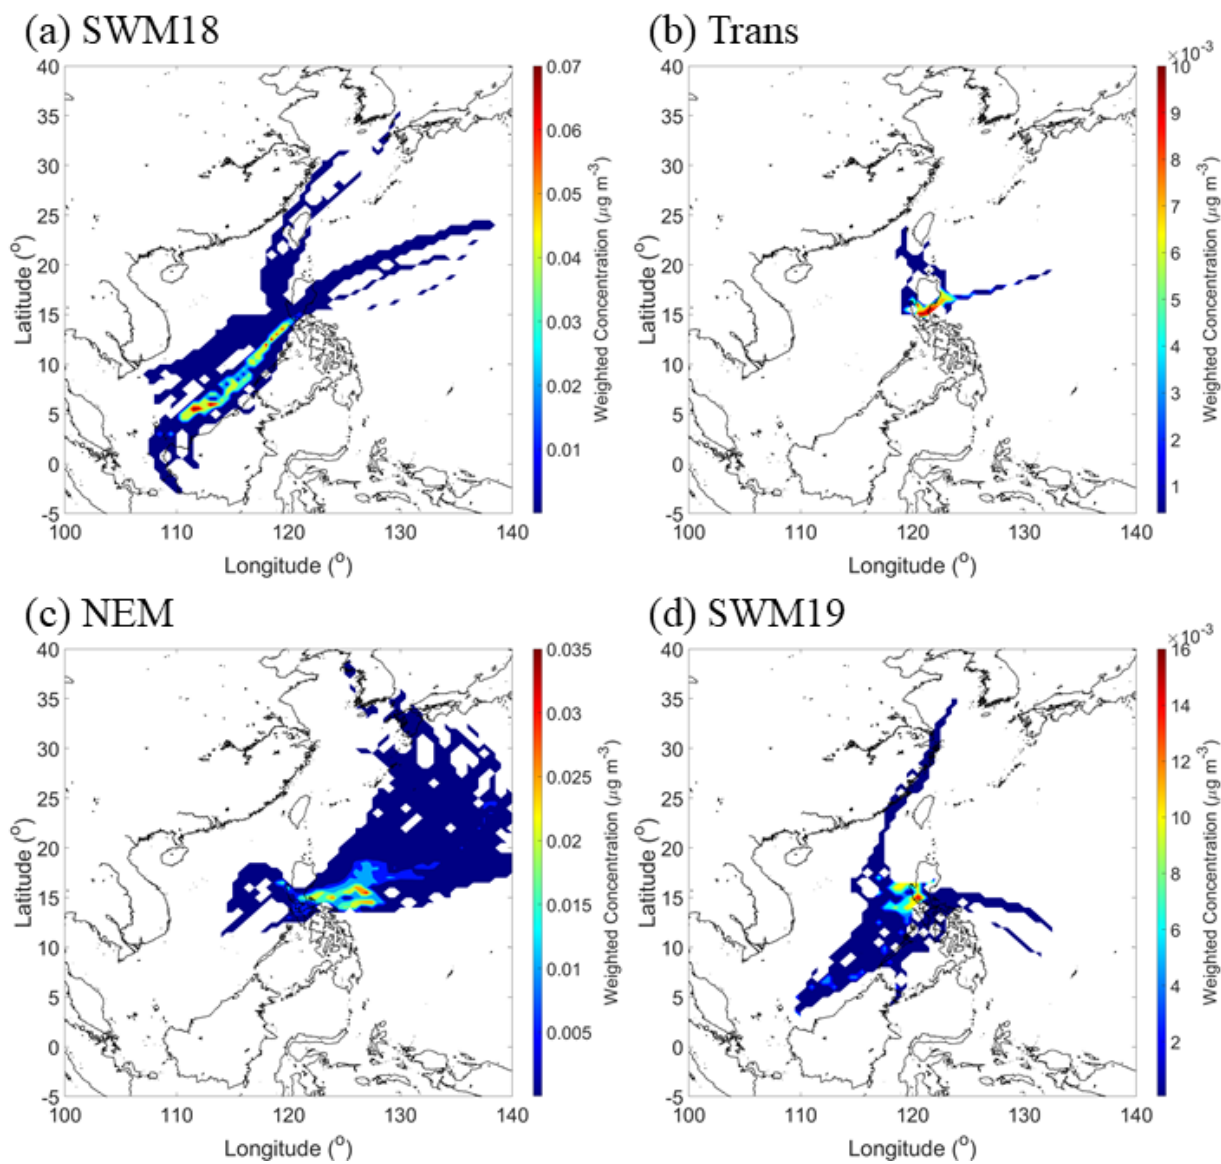

**Figure S5:** Same as Figure S3 except for succinate.

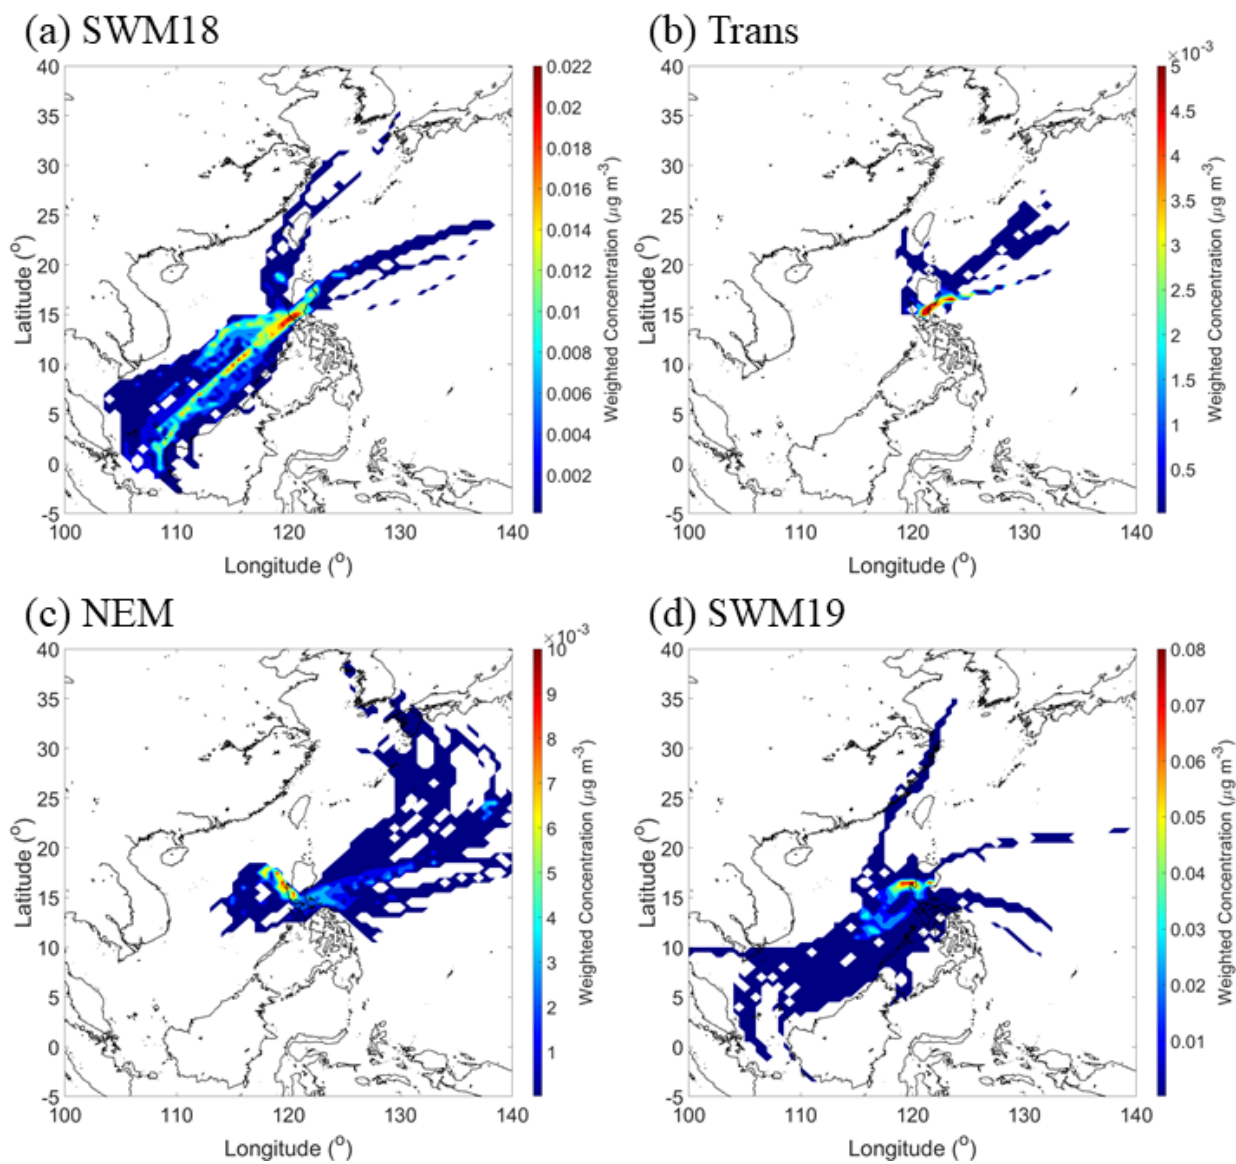

**Figure S6:** Same as Figure S3 except for maleate.

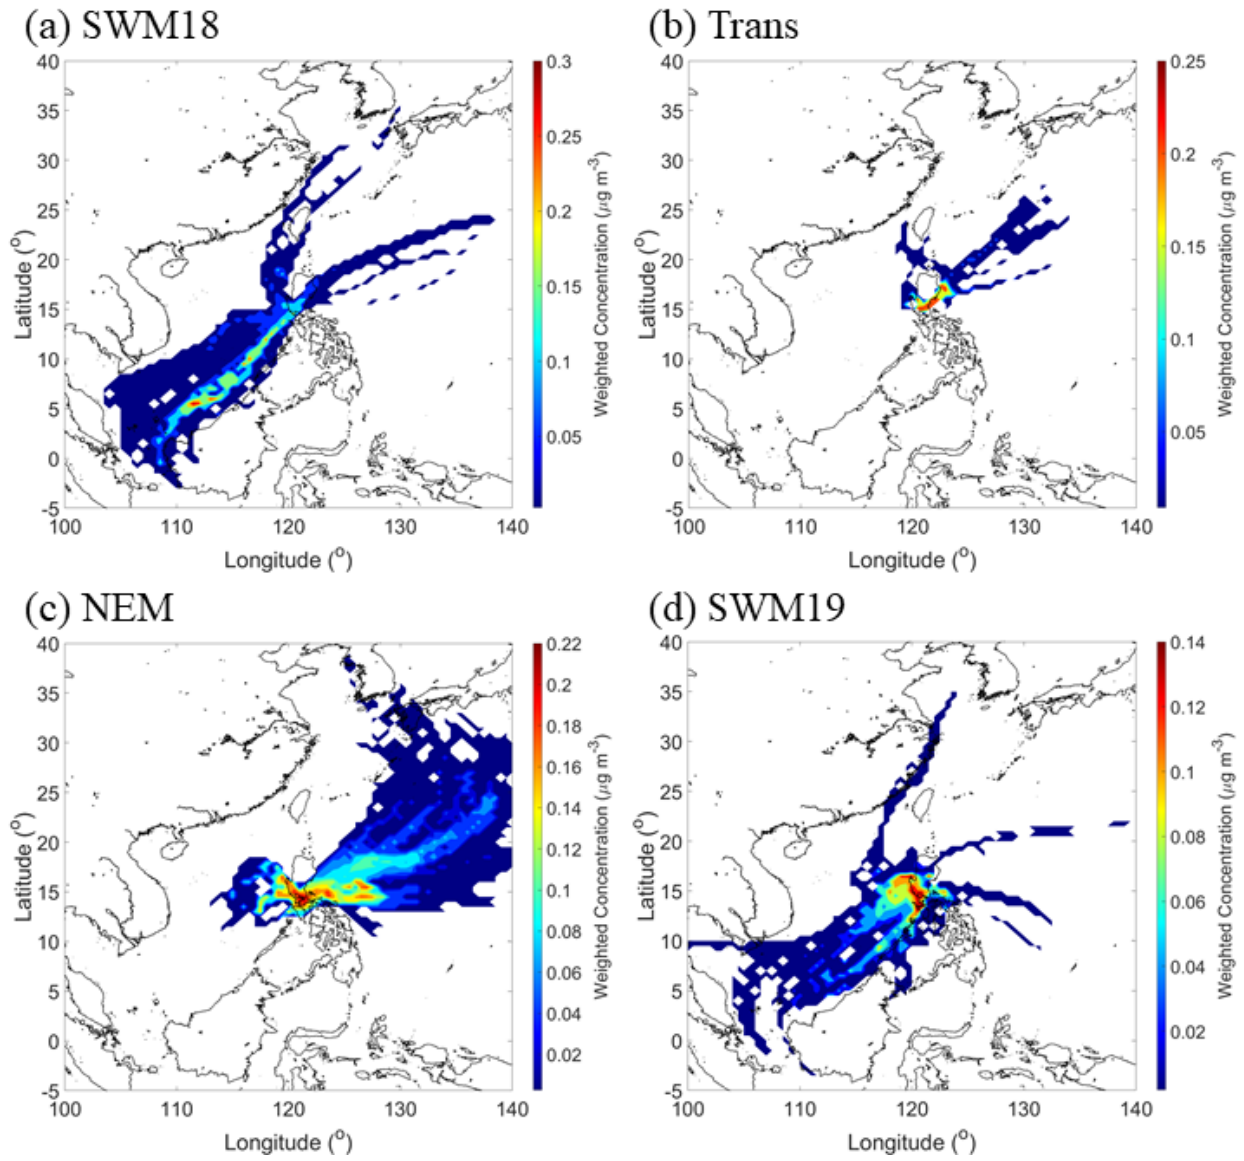

**Figure S7:** Same as Figure S3 except for oxalate.

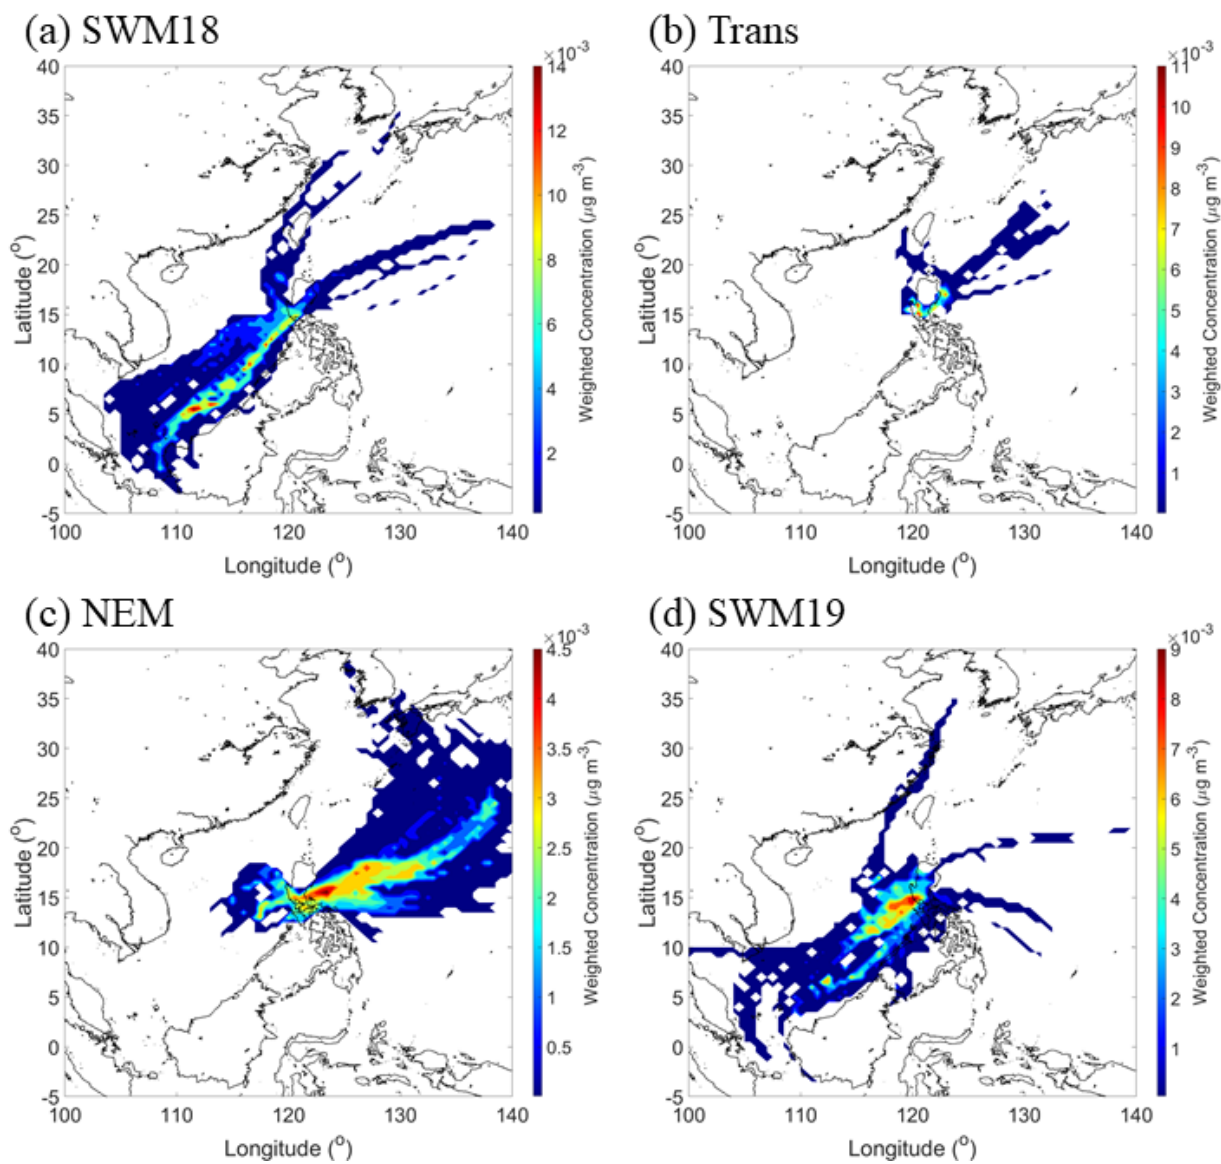

**Figure S8:** Same as Figure S3 except for MSA.

## References

- Bardouki, H., Liakakou, H., Economou, C., Sciare, J., Smolík, J., Ždímal, V., Eleftheriadis, K., Lazaridis, M., Dye, C., and Mihalopoulos, N.: Chemical composition of size-resolved atmospheric aerosols in the eastern Mediterranean during summer and winter, *Atmos Environ*, 37, 195-208, 10.1016/s1352-2310(02)00859-2, 2003.
- Blazso, M., Janitsek, S., Gelencsér, A., Artaxo, P., Graham, B., and Andreae, M. O.: Study of tropical organic aerosol by thermally assisted alkylation-gas chromatography mass spectrometry, *J Anal Appl Pyrol*, 68, 351-369, 10.1016/S0165-2370(03)00082-2, 2003.
- Cheng, C., Wang, G., Meng, J., Wang, Q., Cao, J., Li, J., and Wang, J.: Size-resolved airborne particulate oxalic and related secondary organic aerosol species in the urban atmosphere of Chengdu, China, *Atmos Res*, 161-162, 134-142, 10.1016/j.atmosres.2015.04.010, 2015.
- Decesari, S., Fuzzi, S., Facchini, M. C., Mircea, M., Emblico, L., Cavalli, F., Maenhaut, W., Chi, X., Schkolnik, G., Falkovich, A., Rudich, Y., Claeys, M., Pashynska, V., Vas, G., Kourtchev, I., Vermeylen, R., Hoffer, A., Andreae, M. O., Tagliavini, E., Moretti, F., and Artaxo, P.: Characterization of the organic composition of aerosols from Rondônia, Brazil, during the LBA-SMOCC 2002 experiment and its representation through model compounds, *Atmos Chem Phys*, 6, 375-402, 10.5194/acp-6-375-2006, 2006.
- Ding, X. X., Kong, L. D., Du, C. T., Zhazakova, A., Fu, H. B., Tang, X. F., Wang, L., Yang, X., Chen, J. M., and Cheng, T. T.: Characteristics of size-resolved atmospheric inorganic and carbonaceous aerosols in urban Shanghai, *Atmos Environ*, 167, 625-641, 10.1016/j.atmosenv.2017.08.043, 2017.
- Falkovich, A. H., Graber, E. R., Schkolnik, G., Rudich, Y., Maenhaut, W., and Artaxo, P.: Low molecular weight organic acids in aerosol particles from Rondônia, Brazil, during the biomass-burning, transition and wet periods, *Atmos Chem Phys*, 5, 781-797, 10.5194/acp-5-781-2005, 2005.
- Gao, S., Hegg, D. A., and Jonsson, H.: Aerosol chemistry, and light-scattering and hygroscopicity budgets during outflow from East Asia, *J Atmos Chem*, 46, 55-88, 10.1023/A:1024821409130, 2003.
- Huang, X., Zhang, J., Luo, B., Luo, J., Zhang, W., and Rao, Z.: Characterization of oxalic acid-containing particles in summer and winter seasons in Chengdu, China, *Atmos Environ*, 198, 133-141, 10.1016/j.atmosenv.2018.10.050, 2019.
- Kerminen, V.-M., Teinilä, K., Hillamo, R., and Mäkelä, T.: Size-segregated chemistry of particulate dicarboxylic acids in the Arctic atmosphere, *Atmos Environ*, 33, 2089-2100, 10.1016/s1352-2310(98)00350-1, 1999.
- Maudlin, L. C., Wang, Z., Jonsson, H. H., and Sorooshian, A.: Impact of wildfires on size-resolved aerosol composition at a coastal California site, *Atmos Environ*, 119, 59-68, 10.1016/j.atmosenv.2015.08.039, 2015.
- Mochida, M., Umemoto, N., Kawamura, K., and Uematsu, M.: Bimodal size distribution of C2-C4 dicarboxylic acids in the marine aerosols, *Geophys Res Lett*, 30, 10.1029/2003gl017451, 2003.
- Murphy, S. M., Agrawal, H., Sorooshian, A., Padró, L. T., Gates, H., Hersey, S., Welch, W., Jung, H., Miller, J., Cocker III, D. R., Nenes, A., Jonsson, H. H., Flagan, R. C., and Seinfeld, J. H.: Comprehensive simultaneous shipboard and airborne characterization of exhaust from a modern container ship at sea, *Environ Sci Technol*, 43, 4626-4640, 10.1021/es802413j, 2009.
- Neusüss, C., Pelzing, M., Plewka, A., and Herrmann, H.: A new analytical approach for size-resolved speciation of organic compounds in atmospheric aerosol particles: Methods and first results, *J Geophys Res-Atmos*, 105, 4513-4527, 10.1029/1999jd901038, 2000.
- Park, S.-S., and Kim, J.-H.: Possible sources of two size-resolved water-soluble organic carbon fractions at a roadway site during fall season, *Atmos Environ*, 94, 134-143, 10.1016/j.atmosenv.2014.04.054, 2014.
- Sandrini, S., van Pinxteren, D., Giulianelli, L., Herrmann, H., Poulain, L., Facchini, M. C., Gilardoni, S., Rinaldi, M., Paglione, M., Turpin, B. J., Pollini, F., Bucci, S., Zanca, N., and Decesari, S.: Size-resolved aerosol composition at an urban and a rural site in the Po Valley in summertime: implications for secondary aerosol formation, *Atmos Chem Phys*, 16, 10879-11087, 10.5194/acp-16-10879-2016, 2016.



Sorooshian, A., Csavina, J., Shingler, T., Dey, S., Brechtel, F. J., Saez, A. E., and Betterton, E. A.: Hygroscopic and chemical properties of aerosols collected near a copper smelter: implications for public and environmental health, *Environ Sci Technol*, 46, 9473-9480, 10.1021/es302275k, 2012.

Turekian, V. C., Macko, S. A., and Keene, W. C.: Concentrations, isotopic compositions, and sources of size-resolved, particulate organic carbon and oxalate in near-surface marine air at Bermuda during spring, *J Geophys Res-Atmos*, 108, 10.1029/2002JD002053, 2003.

van Pinxteren, D., Neusüß, C., and Herrmann, H.: On the abundance and source contributions of dicarboxylic acids in size-resolved aerosol particles at continental sites in central Europe, *Atmos Chem Phys*, 14, 3913-3928, 10.5194/acp-14-3913-2014, 2014.

Wang, G., Kawamura, K., Cheng, C., Li, J., Cao, J., Zhang, R., Zhang, T., Liu, S., and Zhao, Z.: Molecular distribution and stable carbon isotopic composition of dicarboxylic acids, ketocarboxylic acids, and alpha-dicarbonyls in size-resolved atmospheric particles from Xi'an City, China, *Environ Sci Technol*, 46, 4783-4791, 10.1021/es204322c, 2012.

Wang, G., Kawamura, K., Xie, M., Hu, S., Li, J., Zhou, B., Cao, J., and An, Z.: Selected water-soluble organic compounds found in size-resolved aerosols collected from urban, mountain and marine atmospheres over East Asia, *Tellus B*, 63, 371-381, 10.1111/j.1600-0889.2011.00536.x, 2017.

Yao, X., Fang, M., and Chan, C. K.: Size distributions and formation of dicarboxylic acids in atmospheric particles, *Atmos Environ*, 36, 2099-2107, 10.1016/s1352-2310(02)00230-3, 2002.

Ziemba, L. D., Griffin, R. J., Whitlow, S., and Talbot, R. W.: Characterization of water-soluble organic aerosol in coastal New England: Implications of variations in size distribution, *Atmos Environ*, 45, 7319-7329, 10.1016/j.atmosenv.2011.08.022, 2011.
